# Supplementary material for: ISSR Analysis of Genetic Diversity and Structure of Plum Varieties Cultivated in Southern China
Source: MDPI journal article supplement (doi:10.3390/biology8010002), 2018-12-21
Supplement: s1 [file s1]

# Genetic Diversity and Structure of Plum Germplasms in Southern China Revealed by ISSR Markers

Weifeng Wu, Faxing Chen, Kaiwun Yeh and Jianjun Chen

## Supplementary Figure and Tables

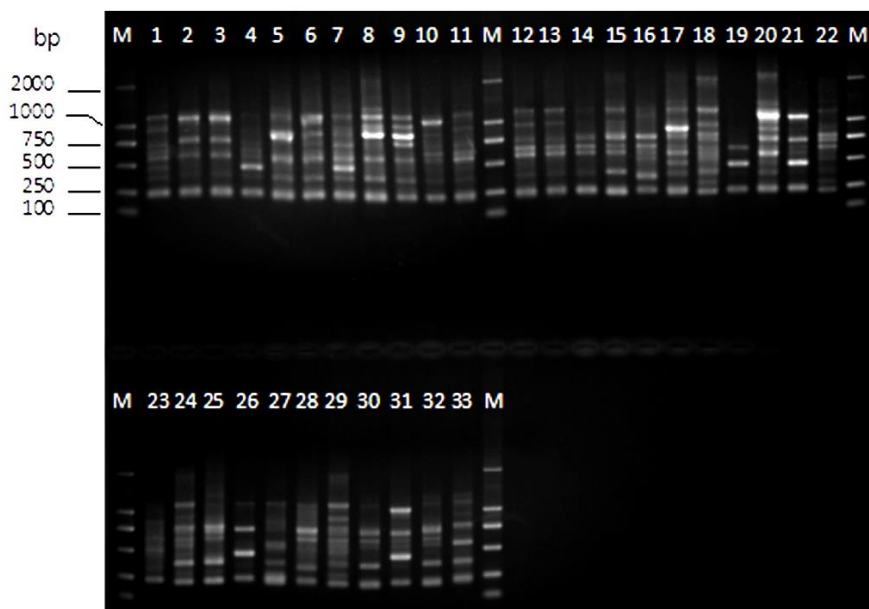

**Figure S1.** ISSR profiles of 33 plum varieties produced by the UBC811 primer. Lane M is marker and lanes 1–33 represent 1–33 varieties listed in Table 1.

**Table S1.** Analysis of molecular variance (AMOVA) of 33 plum varieties based on two regions (Gutian and Yongtai). Statistics include sums of squared deviation (SSD), mean squared deviation (MSD), estimated variance (Est. Var.), genetic differentiation coefficients ( $\Phi_{st}$ ), and the probability ( $P$ ) of obtaining a more extreme component (Gutian and Yongtai).

| Source            | df | SSD     | MSD    | Est. Var. | $\Phi_{st}$ | $P$ -value |
|-------------------|----|---------|--------|-----------|-------------|------------|
| Among Population  | 1  | 59.333  | 59.332 | 2.683     | 12%         | 0.001      |
| Within Population | 31 | 619.455 | 19.982 | 19.982    | 88%         |            |
| Total             | 32 | 678.788 |        | 22.665    | 100%        |            |

**Table S2.** Analysis of molecular variance (AMOVA) of 33 plum varieties based on their origins (China, Japan, and the U.S). Statistics include sums of squared deviation (SSD), mean squared deviation (MSD), estimated variance (Est. Var.), genetic differentiation coefficients ( $\Phi_{st}$ ), and the probability ( $P$ ) of obtaining a more extreme component.

| Source            | df | SSD     | MSD    | Est. Var. | $\Phi_{st}$ | $P$ -value |
|-------------------|----|---------|--------|-----------|-------------|------------|
| Among Population  | 2  | 79.410  | 39.705 | 2.199     | 10%         | 0.001      |
| Within Population | 30 | 599.378 | 19.979 | 19.979    | 90%         |            |
| Total             | 32 | 678.788 |        | 22.178    | 100%        |            |
